# Supplementary material
Source: ML conference proceedings conference paper supplement (https://openreview.net/forum?id=0DZEs8NpUH)
Supplement: supplementary_material [file attachment]

# Obtaining Permission

**Because the IPIP has been placed in the public domain, permission has already been automatically granted for any person to use IPIP items, scales, and inventories for any purpose, commercial or non-commercial..**

**It is not necessary to contact the IPIP site author (Lew Goldberg) or the IPIP Consultant (John A. Johnson) for permission to use IPIP materials. Requests for permission to use IPIP materials will be answered by sending the requester a link to this page.**

*Return [Home](#)*
